# Supplementary material for: Diagnosis and Prognosis of Sepsis Based on Use of Cytokines, Chemokines, and Growth Factors
Source: Hindawi journal article supplement (doi:10.1155/2019/1089107), 2019-09-08
Supplement: f1 [file 1089107.f1.pdf]

**Supplemental Table 1.** Cultured pathogens from sepsis patients

| Pathogen                        | N  |
|---------------------------------|----|
| Gram positive                   |    |
| <i>Staphylococcus aureus</i>    | 6  |
| <i>Enterobacter spp.</i>        | 4  |
| <i>Streptococcus pneumoniae</i> | 1  |
| Gram negative                   |    |
| <i>Escherichia coli</i>         | 12 |
| <i>Klebsiella pneumoniae</i>    | 9  |
| <i>Acinetobacter baumannii</i>  | 8  |
| <i>Pseudomonas aeruginosa</i>   | 7  |
| <i>Proteus mirabilis</i>        | 4  |
| <i>Morganella morganii</i>      | 1  |
| <i>Salmonella spp</i>           | 1  |

**Supplemental Table 2** Cytokine levels in normal control group that showed statistical significance by Mann-Whitney U test

|         | Age group,<br>years | N  | Mean   | Standard deviation |
|---------|---------------------|----|--------|--------------------|
| IL-2    | ≤65                 | 16 | 16.34  | 7.91               |
|         | >65                 | 64 | 8.96   | 10.31              |
| IL-15   | ≤65                 | 16 | 18.00  | 15.06              |
|         | >65                 | 64 | 8.27   | 11.03              |
| IL-27   | ≤65                 | 16 | 4.87   | 19.48              |
|         | >65                 | 64 | 0.00   | 0.00               |
| BDNF    | ≤65                 | 16 | 142.79 | 291.08             |
|         | >65                 | 64 | 40.80  | 130.23             |
| PDGF-BB | ≤65                 | 16 | 79.70  | 137.69             |
|         | >65                 | 64 | 18.87  | 52.10              |

**Supplemental Table 3** Cytokine concentrations among clusters and comparison of clusters

| Molecules              | Cluster 1            | Cluster 2                | Cluster 3               | 1 vs 2 | 2 vs 3 | 1 vs 3 |
|------------------------|----------------------|--------------------------|-------------------------|--------|--------|--------|
| <b>Cytokines</b>       |                      |                          |                         |        |        |        |
| IFN- $\alpha$          | 0.03 $\pm$ 0.38      | 0                        | 50.26 $\pm$ 241.44      |        |        | <0.001 |
| IFN- $\gamma$          | 6.46 $\pm$ 55.81     | 0                        | 37.47 $\pm$ 117.59      |        |        |        |
| IL-1RA                 | 324.59 $\pm$ 944.30  | 90766.57 $\pm$ 128336.37 | 2824.21 $\pm$ 7812.53   |        |        |        |
| IL-1 $\beta$           | 81.40 $\pm$ 341.21   | 81772.34 $\pm$ 115643.56 | 4589.83 $\pm$ 13138.40  | 0.01   |        |        |
| IL-1 $\alpha$          | 111.08 $\pm$ 595.99  | 6.25 $\pm$ 1.09          | 10077.10 $\pm$ 16520.51 | 0.006  |        | <0.001 |
| IL-2                   | 10.38 $\pm$ 235.69   | 32.36 $\pm$ 10.88        | 11.41 $\pm$ 37.15       | 0.013  | 0.009  |        |
| IL-4                   | 374.64 $\pm$ 1441.92 | 29.18 $\pm$ 26.03        | 12069.11 $\pm$ 24716    | 0.008  |        | <0.001 |
| IL-5                   | 1.75 $\pm$ 8.35      | 13.08 $\pm$ 15.54        | 14.11 $\pm$ 26.31       | <0.001 |        | <0.001 |
| IL-6                   | 10.37 $\pm$ 33.22    | 195.43 $\pm$ 283.86      | 163.58 $\pm$ 659.55     | <0.001 |        |        |
| IL-7                   | 9.03 $\pm$ 30.93     | 9466.05 $\pm$ 10938.06   | 371.77 $\pm$ 1586.27    | 0.043  |        |        |
| IL-8                   | 55.26 $\pm$ 409.15   | 6118.83 $\pm$ 12125.17   | 1375.96 $\pm$ 3992.14   | 0.002  |        | <0.001 |
| IL-9                   | 3.64 $\pm$ 15.91     | 378.41 $\pm$ 550.49      | 32.67 $\pm$ 66.94       | <0.001 |        | <0.001 |
| IL-10                  | 38.10 $\pm$ 267.73   | 894.67 $\pm$ 1768.19     | 956.24 $\pm$ 2036.06    | 0.01   |        | <0.001 |
| IL-12p70               | 0.71 $\pm$ 2.12      | 556.22 $\pm$ 770.41      | 11.01 $\pm$ 39.63       |        |        | <0.001 |
| IL-13                  | 3.25 $\pm$ 13.85     | 1552.05 $\pm$ 2447.52    | 140.63 $\pm$ 456.11     |        |        | <0.001 |
| IL-15                  | 8.80 $\pm$ 0.1       | 9.41 $\pm$ 10.16         | 30.63 $\pm$ 149.17      |        |        |        |
| IL-17A                 | 3.45 $\pm$ 9.00      | 32.45 $\pm$ 29.64        | 20.16 $\pm$ 34.86       | 0.001  |        | <0.001 |
| IL-18                  | 6.04 $\pm$ 20.65     | 14.96 $\pm$ 16.10        | 32.14 $\pm$ 66.15       | 0.01   |        | <0.001 |
| IL-21                  | 11.59 $\pm$ 45.66    | 89.53 $\pm$ 117.56       | 23.27 $\pm$ 39.92       | 0.003  |        | <0.001 |
| IL-22                  | 21.1 $\pm$ 91.42     | 262.31 $\pm$ 467.33      | 69.48 $\pm$ 192.62      | 0.001  |        | 0.002  |
| IL-23                  | 22.8 $\pm$ 154.42    | 724.03 $\pm$ 1348.31     | 274.03 $\pm$ 974.71     | <0.001 |        | <0.001 |
| IL-27                  | 16.83 $\pm$ 75.01    | 199.22 $\pm$ 296.47      | 849.62 $\pm$ 4510.31    | <0.001 |        | <0.001 |
| IL-31                  | 3.99 $\pm$ 19.27     | 50.54 $\pm$ 45.96        | 50.12 $\pm$ 152.40      | <0.001 |        | <0.001 |
| LIF                    | 10.96 $\pm$ 33.64    | 71.93 $\pm$ 123.01       | 111.51 $\pm$ 373.25     |        |        |        |
| GM-CSF (CSF2)          | 0.06 $\pm$ 0.61      | 5.71 $\pm$ 12.76         | 15.35 $\pm$ 68.66       | 0.001  |        | 0.04   |
| SCF (KITLG)            | 83.78 $\pm$ 82.45    | 78.10 $\pm$ 96.12        | 32.25 $\pm$ 23.26       |        |        | 0.001  |
| TNF- $\alpha$ (LTA)    | 2.73 $\pm$ 7.94      | 46.17 $\pm$ 50.33        | 96.04 $\pm$ 416.02      | 0.001  |        |        |
| TNF- $\beta$ (LTB)     | 0.93 $\pm$ 5.64      | 199.73 $\pm$ 433.83      | 14.22 $\pm$ 23.59       | <0.001 |        | <0.001 |
| <b>Chemokines</b>      |                      |                          |                         |        |        |        |
| CCL2 (MCP-1)           | 146.62 $\pm$ 218.59  | 2978.34 $\pm$ 1701.76    | 766.09 $\pm$ 1081.83    | 0.005  |        | <0.001 |
| CCL3 (MIP-1 $\alpha$ ) | 92.10 $\pm$ 317.88   | 120.32 $\pm$ 54.90       | 242.30 $\pm$ 427.63     | 0.005  |        | <0.001 |
| CCL4 (MIP-1 $\beta$ )  | 328.89 $\pm$ 504.56  | 1743.79 $\pm$ 1382.48    | 547.83 $\pm$ 613.79     | 0.017  |        |        |
| CCL5 (RANTES)          | 354.51 $\pm$ 912.42  | 538.14 $\pm$ 321.84      | 1265.71 $\pm$ 3628.00   |        |        |        |
| CCL11 (Eotaxin)        | 173.82 $\pm$ 210.18  | 159.41 $\pm$ 90.89       | 366.70 $\pm$ 278.58     |        |        | <0.001 |
| CXCL1 (GRO- $\alpha$ ) | 66.30 $\pm$ 238.37   | 223.36 $\pm$ 163.92      | 362.02 $\pm$ 837.42     | 0.001  |        | <0.001 |
| CXCL10 (IP-10)         | 58.26 $\pm$ 104.27   | 409.06 $\pm$ 493.48      | 180.81 $\pm$ 253.36     | 0.001  |        | <0.001 |
| CXCL12 (SDF-1)         | 703.59 $\pm$ 492.57  | 2296.96 $\pm$ 1624.28    | 729.21 $\pm$ 847.58     | 0.0023 | 0.03   |        |
| <b>Growth factors</b>  |                      |                          |                         |        |        |        |
| BDNF                   | 214.23 $\pm$ 375.93  | 937.66 $\pm$ 950.02      | 702.81 $\pm$ 596.03     | 0.007  |        | <0.001 |
| EGF                    | 153.95 $\pm$ 185.65  | 44.79 $\pm$ 34.95        | 49.16 $\pm$ 78.35       |        |        | <0.001 |
| FGF-2                  | 25.12 $\pm$ 33.02    | 29.29 $\pm$ 40.12        | 27.82 $\pm$ 68.44       |        |        |        |
| HGF                    | 251.43 $\pm$ 432.42  | 2482.39 $\pm$ 1614.65    | 1637.04 $\pm$ 2343.02   | <0.001 |        | <0.001 |
| NGF                    | 111.03 $\pm$ 137.94  | 46.49 $\pm$ 36.48        | 34.76 $\pm$ 55.73       |        |        | 0.001  |
| PDGF-BB                | 144.04 $\pm$ 469.85  | 2043.20 $\pm$ 3406.57    | 769.97 $\pm$ 960.02     | 0.003  |        | <0.001 |
| PLGF-1                 | 143.88 $\pm$ 149.30  | 535.78 $\pm$ 757.60      | 300.93 $\pm$ 277.85     | 0.025  |        |        |
| VEGF-A                 | 239.01 $\pm$ 574.98  | 1918.95 $\pm$ 1363.06    | 1125.42 $\pm$ 1466.87   | 0.001  |        | <0.001 |
| VEGF-D (FIGF)          | 111.09 $\pm$ 167.33  | 54.17 $\pm$ 35.37        | 33.96 $\pm$ 24.76       |        |        |        |

IFN, interferon; IL, interleukin; LIF, leukemia inhibitory factor; TNF, tumor necrosis factor; CCL, CC motif chemokine ligand; CXCL, CXC motif ligand; BDNF, brain derived neurotrophic factor; EGF, epidermal growth factor; FGF, fibroblast growth factor; GM-CSF, granulocyte macrophage colony stimulating factor; HGF, hepatocyte growth factor; NGF, nerve growth factor; PDGF, platelet derived growth factor; PLGF, placental growth factor ; SCF, stem cell factor; VEGF, vascular endothelial growth factor

**Supplemental Figure 1.** Dendrogram of clustering analysis that resulted in three clusters

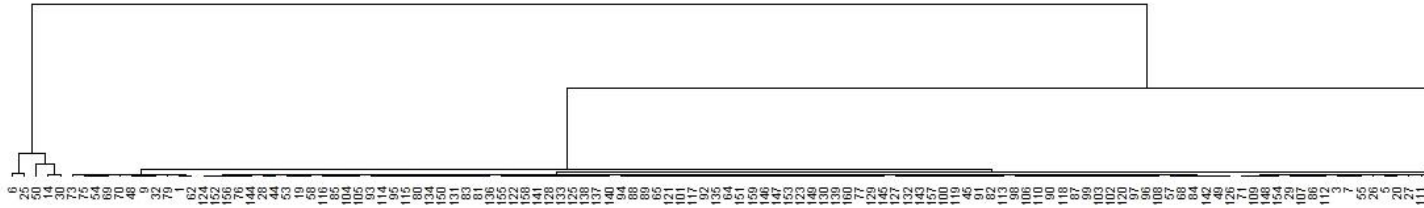

Cluster 2 (n=5)

Cluster 1 (n=124)
